# Supplementary material for: A Point Mutation V419L in the Sodium Channel Gene from Natural Populations of Aedes aegypti Is Involved in Resistance to λ-Cyhalothrin in Colombia
Source: MDPI journal article supplement (doi:10.3390/insects9010023), 2018-02-14
Supplement: s1 [file s1]

Article

# A Point Mutation V419L in the Sodium Channel Gene from Natural Populations of *Aedes aegypti* Is Involved in Resistance to $\lambda$ -Cyhalothrin in Colombia

Supplementary Materials:

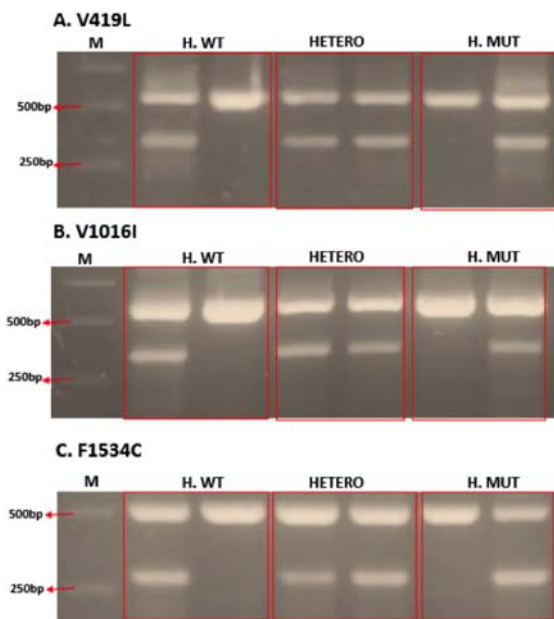

**Figure S1.** Allele specific PCR profile representative of point mutations obtained in *Ae. aegypti* mosquitoes from three Colombian cities. A. V419L. B. V1016I. C. F1534C. H.WT: Homozygote wild type, Hetero: heterozygote, H.MUT: homozygote mutated.

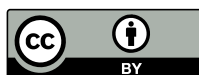

© 2018 by the authors. Submitted for possible open access publication under the terms and conditions of the Creative Commons Attribution (CC BY) license (<http://creativecommons.org/licenses/by/4.0/>).
